# Supplementary material
Source: PubMed Central journal article supplement (PMC3686529)
Supplement: NIHMS468585-supplement-supplement_1.pdf [file NIHMS468585-supplement-supplement_1.pdf]

Table 1A  
*Percent Engaging in Substance Use and Delinquency, by Scale Item*

|                                                              | Wave 1 | Wave 2 | Wave 3 |
|--------------------------------------------------------------|--------|--------|--------|
| Substance use                                                |        |        |        |
| Smoking                                                      | 57.74  | 46.75  | 35.84  |
| Binge drinking                                               | 26.86  | 28.84  | 51.75  |
| Marijuana use                                                | 27.25  | 25.96  | 33.13  |
| Cocaine use                                                  | 3.16   | 2.31   | 6.99   |
| Inhalants (W1, W2); crystal meth (W3)                        | 6.01   | 2.30   | 2.75   |
| Other <sup>a</sup>                                           | 8.29   | 6.15   | 10.23  |
| Delinquency                                                  |        |        |        |
| Damage property                                              | 18.37  | 15.32  | 9.12   |
| Stole <\$50 value                                            | 19.42  | 15.94  | 3.41   |
| Stole >=\$50 value                                           | 4.69   | 4.49   | 8.21   |
| Broke into house to steal                                    | 4.80   | 3.83   | 1.75   |
| Got in a physical fight                                      | 32.15  | 20.20  | 3.63   |
| Hurt someone -- required medical attention                   | 18.16  | 8.18   | 5.77   |
| Used or threatened to use weapon                             | 3.86   | 3.27   | 1.79   |
| Got in a group fight                                         | 19.80  | 18.53  | 9.18   |
| Pulled a gun/knife                                           | 4.43   | 4.11   | 1.33   |
| Shot or stabbed someone                                      | 1.69   | 1.67   | 0.39   |
| Sold drugs                                                   | 7.44   | 7.40   | 8.40   |
| Vandalism/graffiti (W1, W2); bad check (W3)                  | 8.98   | 7.45   | 3.95   |
| Took from store (W1, W2); bought/sold stolen property (W3)   | 23.21  | 18.79  | 4.64   |
| Car w/o permission (W1, W2); credit card w/o permission (W3) | 10.01  | 7.76   | 1.37   |
| <i>N</i>                                                     | 17,977 | 12,446 | 13,481 |

*Note:* Percents are weighted in Stata 12.0.

<sup>a</sup>"Other" at wave 1 and 2 includes: illegal drugs such as LSD, PCP, ecstasy, speed, ice, heroin, or pills without a doctor's permission. At wave 3, this category also includes inhalants.

Table 2A  
*Means on Analysis Variables, Add Health*

|                                          | Mean  | SD      | Range   |
|------------------------------------------|-------|---------|---------|
| <i>TI Analysis measures (N = 17,977)</i> |       |         |         |
| Depressive symptoms                      | 0.63  | (0.47)  | 0 – 3   |
| Substance use                            | .63   |         |         |
| Delinquency                              | 1.77  | (2.35)  | 0 – 14  |
| Family dinners                           | 4.71  | (2.48)  | 0 – 7   |
| Global family relationship               | 3.76  | (0.82)  | 1 – 5   |
| Parent–child relationship                | 4.51  | (0.57)  | 1 – 5   |
| Activities with parent                   | 1.74  | (1.14)  | 0 – 5   |
| Arguments with parent                    | .38   |         |         |
| Parental control                         | 1.87  | (1.58)  | 0 – 7   |
| Female                                   | .50   |         |         |
| Age at wave 1                            | 15.96 | (1.81)  | 11 – 21 |
| White                                    | .66   |         |         |
| Black                                    | .15   |         |         |
| Hispanic                                 | .12   |         |         |
| Asian                                    | .04   |         |         |
| Other race/ethnicity                     | .04   |         |         |
| Both parents                             | .56   |         |         |
| Stepparent                               | .16   |         |         |
| Single parent                            | .23   |         |         |
| Other family structure                   | .04   |         |         |
| Number of other children in hh           | 1.21  | (1.24)  | 0 – 11  |
| Family income (thousands)                | 45.36 | (52.48) | 0 – 999 |
| Mother employed full time                | .58   |         |         |
| Mother employed part time                | .19   |         |         |
| Mother not currently employed            | .23   |         |         |
| Mother <HS                               | .18   |         |         |
| Mother HS                                | .37   |         |         |
| Mother some college                      | .20   |         |         |
| Mother college degree                    | .25   |         |         |
| Father <HS                               | .18   |         |         |
| Father HS                                | .36   |         |         |
| Father some college                      | .18   |         |         |
| Father college                           | .28   |         |         |

Table 2A

*Means on Analysis Variables, Add Health*

---

|                                          | Mean  | SD   | Range    |
|------------------------------------------|-------|------|----------|
| Change T2 - T1 (N = 12,466)              |       |      |          |
| Depressive symptoms                      | 0.10  | 0.44 | -3 – 3   |
| Substance use                            | -0.05 | 0.47 | -1 – 1   |
| Delinquency                              | -0.43 | 2.10 | -14 – 14 |
| Family dinners                           | -0.19 | 2.50 | -7 – 7   |
| Family structure (0/1)                   | .11   |      |          |
| Number of other children in hh           | -0.09 | 0.68 | -11 – 11 |
| Mother starts full-time employment (0/1) | .12   |      |          |
| Mother stops full-time employment (0/1)  | .08   |      |          |
| Global family relationship quality       | -0.03 | 0.55 | -4 – 4   |
| Parent-child relationship quality        | -0.09 | 0.52 | -4 – 4   |
| Activities with a parent                 | -0.18 | 1.16 | -5 – 5   |
| Arguments with a parent                  | -0.01 | 0.57 | -1 – 1   |
| Parental control                         | -0.39 | 1.58 | -7 – 7   |
| <br>T3 Outcomes (N = 13,481)             |       |      |          |
| Depressive symptoms                      | 0.50  | 0.45 | 0 – 3    |
| Substance use (0/1)                      | .67   |      |          |
| Delinquency                              | 0.63  | 1.33 | 0 – 14   |

---

*Note:* Weighted and design adjusted descriptives using *svy* commands in Stata 12.0.
